# Supplementary figures and images for: An optical fiber sensor based on a B10H14 derivatives/PMMA film for measuring low concentration formaldehyde in aqueous solutions
Source: Royal Society of Chemistry journal article supplement (doi:10.1039/d4ay01714e), 2024-01-01

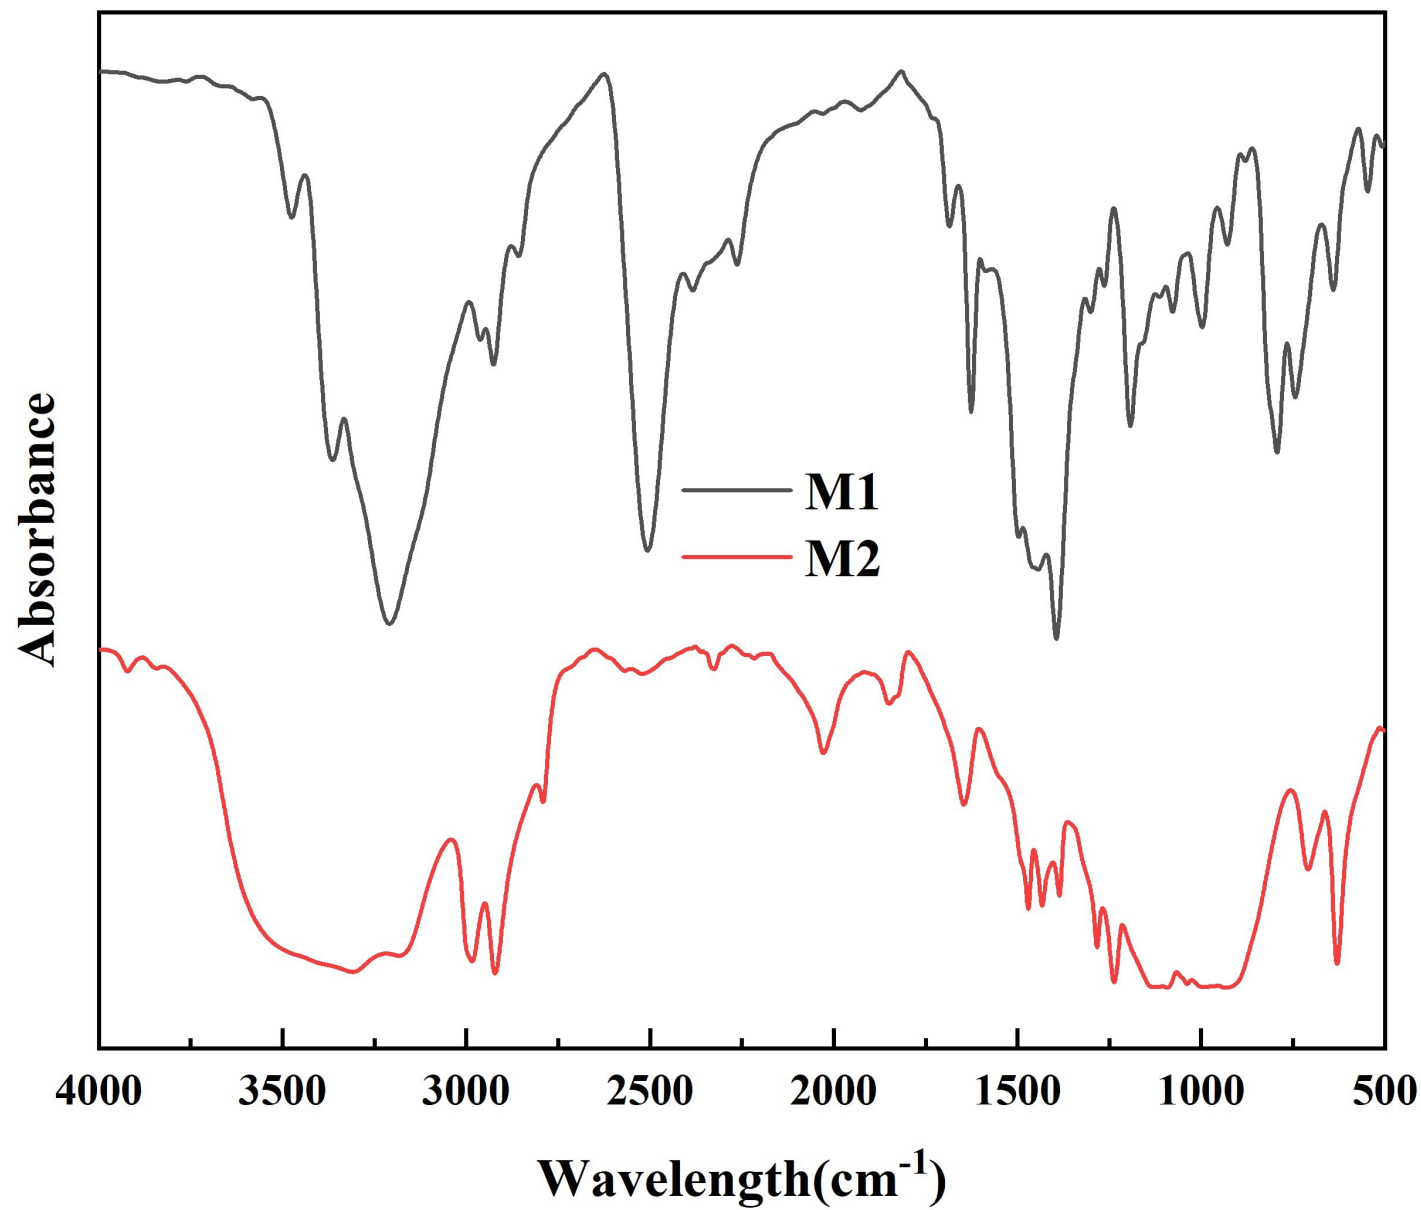

Supplement: d4ay01714e5.pdf [file d4ay01714e5.pdf]
